# Supplementary material for: Self-decoupled radiofrequency coils for magnetic resonance imaging
Source: PubMed Central journal article supplement (PMC6113296; doi:10.1038/s41467-018-05585-8), 2018-08-28
Supplement: 41467_2018_5585_MOESM1_ESM.pdf [file 41467_2018_5585_MOESM1_ESM.pdf]

# Supplementary Information

## **Self-decoupled radiofrequency coils for magnetic resonance imaging**

Yan *et al.*

The Supplementary Information includes 10 Supplementary Figures and 2 Supplementary Tables.

| $C_{\text{mode}}$<br>(pF) | $f_{\text{odd}}$<br>(MHz) | $f_{\text{even}}$<br>(MHz) | $f_m$<br>(MHz) | $K_m$  | $K_e$ | $K_{\text{total}}$ |
|---------------------------|---------------------------|----------------------------|----------------|--------|-------|--------------------|
| <b>8.00</b>               | 308.2                     | 289.2                      | 195.0          | -0.110 | 0.047 | -0.063             |
| <b>6.00</b>               | 308.2                     | 289.2                      | 196.0          | -0.110 | 0.048 | -0.063             |
| <b>4.00</b>               | 308.4                     | 289.2                      | 199.6          | -0.114 | 0.052 | -0.063             |
| <b>2.00</b>               | 308.0                     | 289.6                      | 202.0          | -0.112 | 0.052 | -0.060             |
| <b>1.00</b>               | 302.0                     | 291.2                      | 241.0          | -0.109 | 0.071 | -0.037             |
| <b>0.80</b>               | 300.6                     | 292.2                      | 253.2          | -0.108 | 0.078 | -0.030             |
| <b>0.60</b>               | 298.6                     | 294.0                      | 270.8          | -0.098 | 0.082 | -0.017             |
| <b>0.30</b>               | 293.8                     | 298.8                      | 323.0          | -0.087 | 0.103 | 0.016              |
| <b>0.20</b>               | 291.8                     | 300.8                      | 350.0          | -0.076 | 0.106 | 0.029              |
| <b>0.10</b>               | 289.4                     | 303.2                      | 386.0          | -0.067 | 0.112 | 0.046              |
| <b>0.01</b>               | 287.0                     | 306.2                      | 438.0          | -0.055 | 0.119 | 0.064              |

**Supplementary Table 1** Calculated coupling coefficients using full-wave electromagnetic simulations.

The coils had the same size and geometry as those in Figure 2. First, a single coil was tuned to the Larmor frequency ( $f_0=298$  MHz). Then its resonance frequencies in odd mode ( $f_{\text{odd}}$ ) and even mode ( $f_{\text{even}}$ ) were obtained by inserting an electric wall and a magnetic wall (Hong & Lancaster, IEEE Trans. Microw. Theory Techn. 44, 2099-2109, 1996), respectively.  $f_m$  is the transmission zero frequency in the presence of another identical coil. Finally, the magnetic ( $K_m$ , loop-mode) coupling coefficient, the electric ( $K_e$ , dipole-mode) coupling coefficient and the total coupling coefficient ( $K_{\text{total}}$ ) were calculated based on the following equations from Chu *et al.* (IEEE Trans. Microw. Theory Techn. 56, 431-439, 2008):

$$|K_m| = \frac{1}{2} \left( \frac{f_{\text{odd}}^2 - f_0^2}{f_{\text{odd}}^2 - f_m^2} + \frac{f_{\text{even}}^2 - f_0^2}{f_m^2 - f_{\text{even}}^2} \right) \quad (1)$$

$$|K_e| = \frac{f_m^2}{2f_0^2} \left( \frac{f_0^2 - f_{\text{odd}}^2}{f_m^2 - f_{\text{odd}}^2} + \frac{f_0^2 - f_{\text{even}}^2}{f_{\text{even}}^2 - f_m^2} \right) \quad (2)$$

$$K_{\text{total}} = \frac{K_m + K_e}{1 + K_m K_e} \quad (3)$$

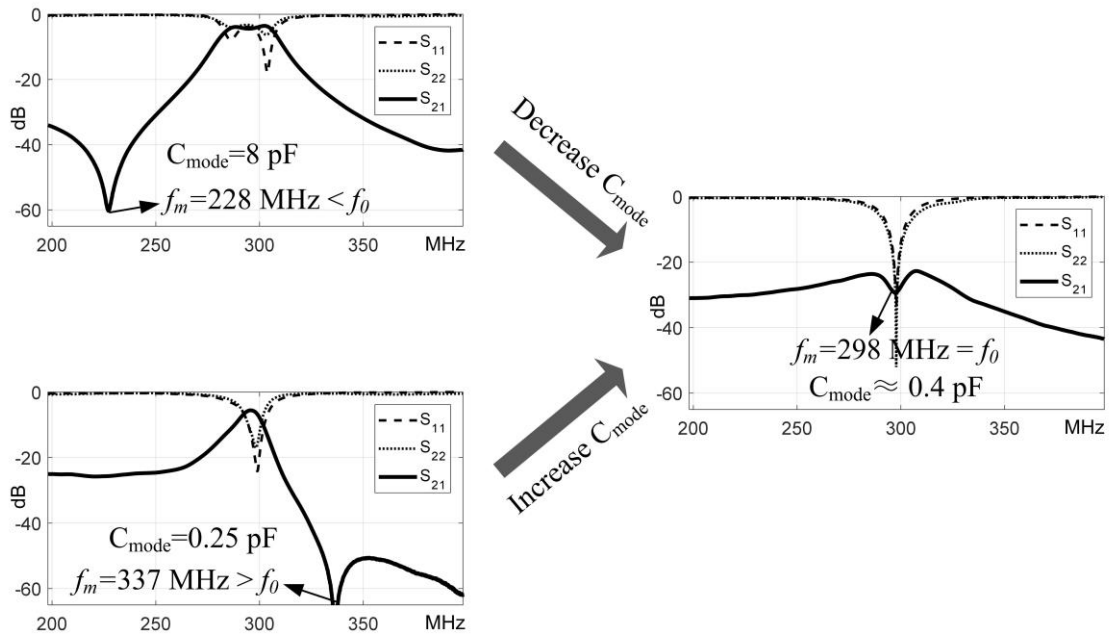

**Supplementary Figure 1** Illustration of how to tune  $C_{\text{mode}}$  to achieve self-decoupling based on bench measurements of  $S_{21}$ . When  $f_m$  is lower (**left, top**) or higher (**left, bottom**) than the desired resonance frequency  $f_0$ ,  $C_{\text{mode}}$  needs to be decreased or increased, respectively, to bring  $f_m$  to  $f_0$  and achieve the best decoupling performance.

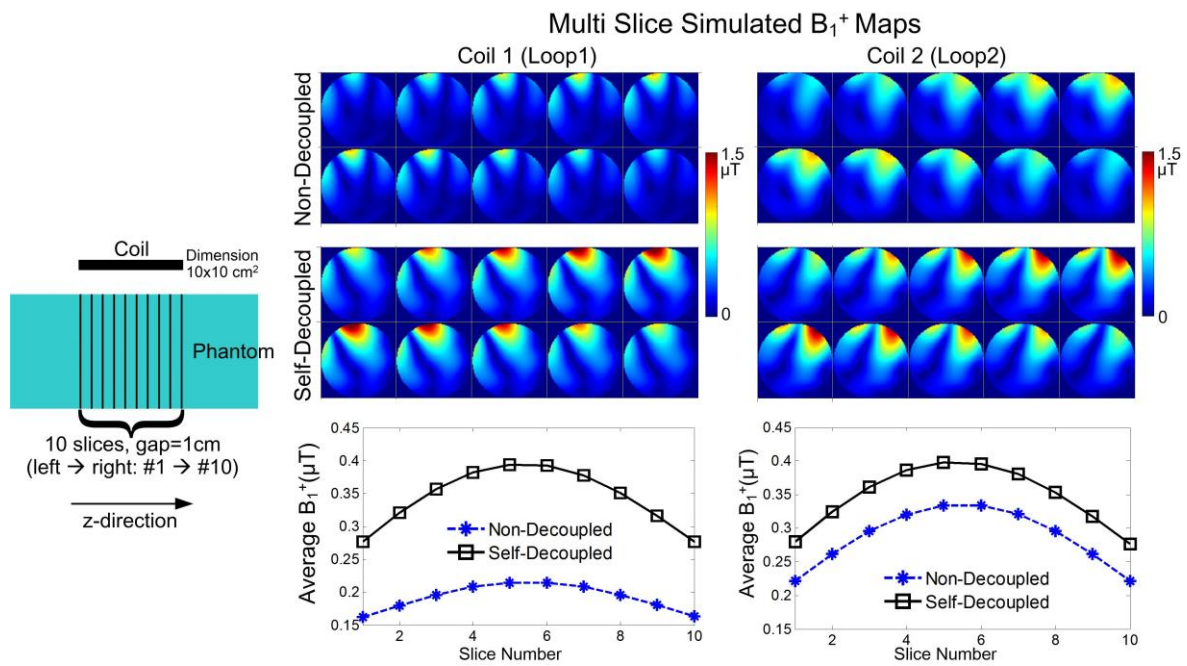

**Supplementary Figure 2** Simulated multi-slice axial  $B_1^+$  maps of two non-decoupled conventional coils (top row) and two self-decoupled coils (middle row) in a loop-loop configuration. The same input power (1 Watt) was used for all measurements. The bottom row plots the average  $B_1^+$  in each slice. Number of slices = 10, Slice gap = 1cm. Although the current is non-uniform in self-decoupled coils (stronger near the feed port and weaker near the  $C_{\text{mode}}$  capacitor), the slice-by-slice  $B_1^+$  maps decay similarly to non-decoupled coils' maps. This can be understood by considering that the  $B_1^+ = (B_x + iB_y)/2$  field is mainly produced by the current on the vertical conductor segments for this square coil, where the current distribution is relatively uniform.

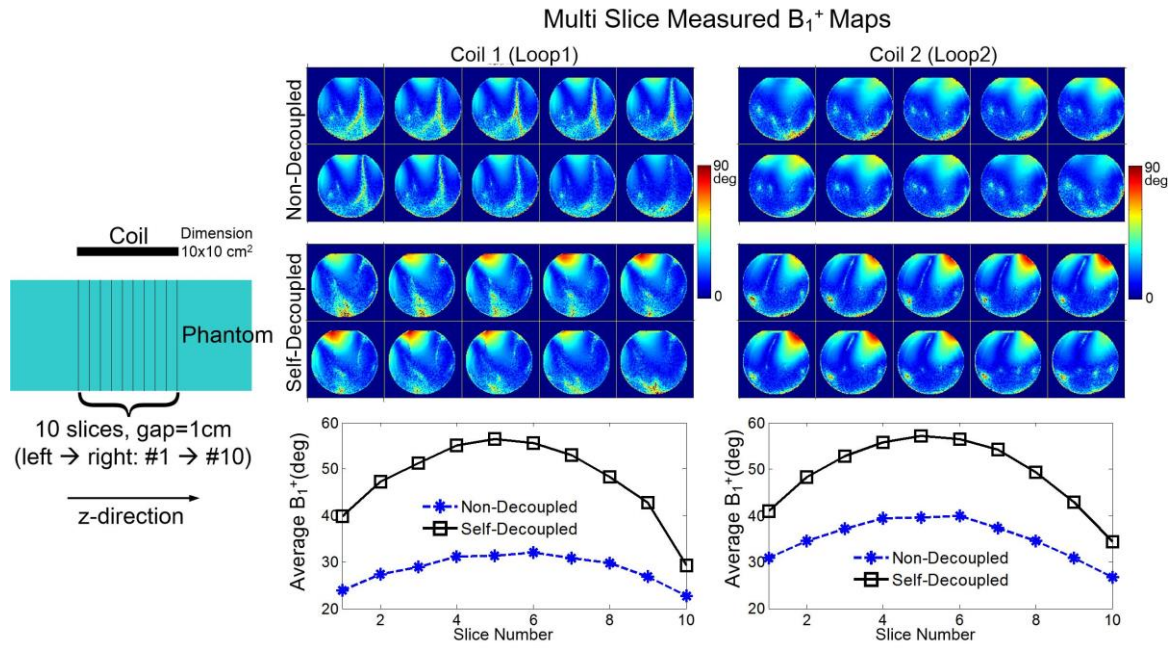

**Supplementary Figure 3** Measured multi-slice axial  $B_1^+$  maps of two non-decoupled conventional coils (top row) and two self-decoupled coils (middle row) in a loop-loop configuration. The same input power was used for all measurements. The bottom row plots the average  $B_1^+$  in each slice. Number of slices = 10, Slice gap = 1 cm. The overall experimental results are consistent with the simulated  $B_1^+$  maps in Supplementary Figure 2. The measured  $B_1^+$  maps are not as uniform along the z-direction as the simulated maps, which is because (due to its small value) only one  $X_{\text{arm}}$  inductor was used in the constructed coils while six  $X_{\text{arm}}$  were used in the simulated coils.

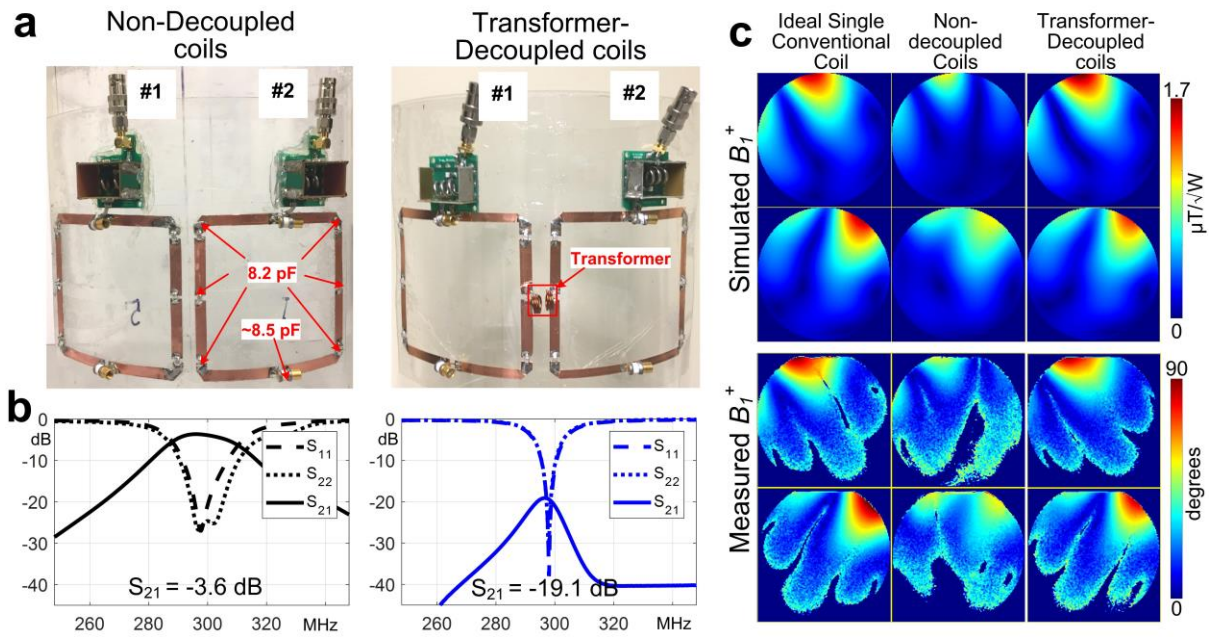

**Supplementary Figure 4** Comparison of two-loop non-decoupled conventional coils and transformer-decoupled coils. **a)** Constructed two-element non-decoupled conventional (**left**) and transformer-decoupled (**right**) coil arrays, with the same dimensions as the simulated coils in Figure 2. **b)** Measured S-parameter plots of the non-decoupled conventional (**left**) and transformer-decoupled coils (**right**). **c)** Simulated and measured axial RF transmit field strength ( $B_1^+$ ) maps of ideal single conventional coils, the two non-decoupled conventional loops and the two transformer-decoupled coils.

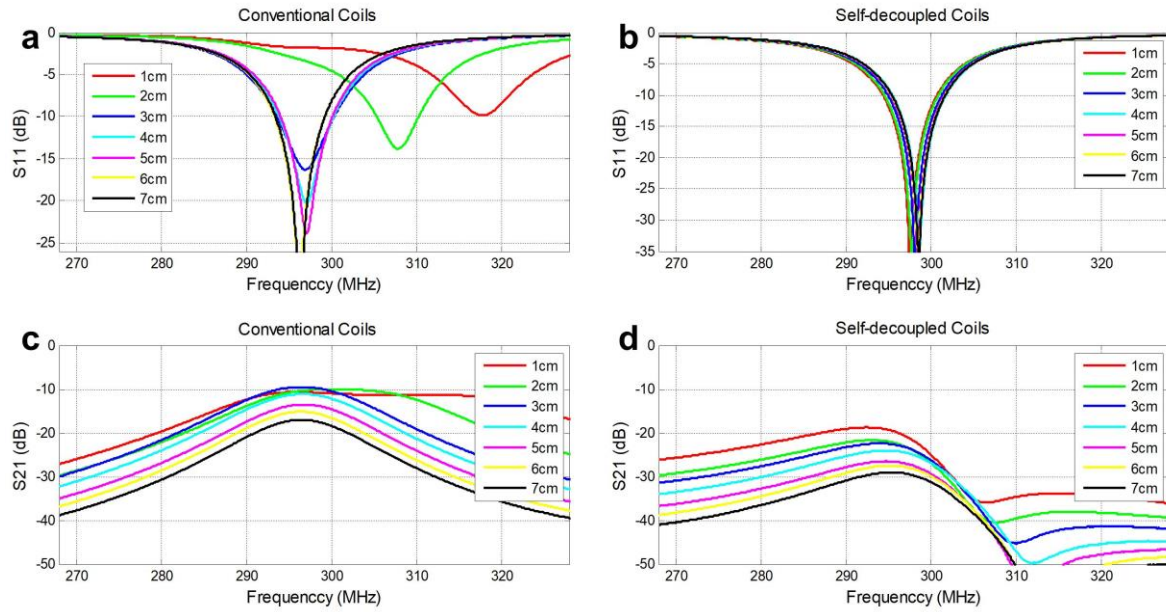

**Supplementary Figure 5** Measured S-parameter plots versus frequency with different coil separations ( $D_{\text{coil}}$ , from 1 cm to 7 cm with steps of 1 cm). **a)**  $S_{11}$  plots (matching performance) of two conventional coils. **b)**  $S_{11}$  plots of two self-decoupled coils. **c)**  $S_{21}$  plots (decoupling performance) of two conventional coils. **d)**  $S_{21}$  plots of two self-decoupled coils. The conventional coils' performance depends strongly on  $D_{\text{coil}}$ . For  $D_{\text{coil}}$  less than 3 cm, the strong coupling caused resonant peak splitting and impedance mismatch. For the self-decoupled coils, however, excellent matching ( $<-22$  dB) and decoupling performance ( $<-20$  dB) were maintained as  $D_{\text{coil}}$  changed from 7 cm to 1 cm.

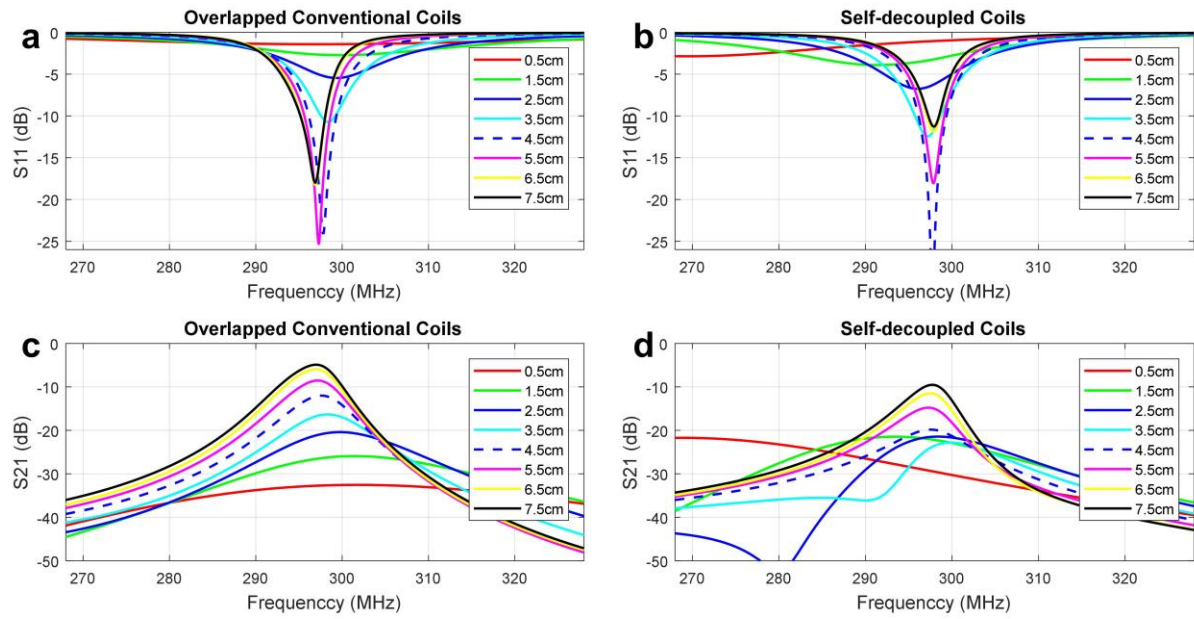

**Supplementary Figure 6** Measured S-parameter plots versus frequency with different coil-to-phantom distances ( $D_{\text{phantom}}$ , 1.5 cm to 7.5 cm in 1 cm steps). The coils were initially tuned, matched and decoupled when  $D_{\text{phantom}} = 4.5$  cm, and were not readjusted for other  $D_{\text{phantom}}$ . **a)**  $S_{11}$  plots (matching performance) of two overlapped conventional coils. **b)**  $S_{11}$  plots of two self-decoupled coils. **c)**  $S_{21}$  plots (decoupling performance) of two overlapped conventional coils. **d)**  $S_{21}$  plots of two self-decoupled coils. Compared to the conventional coil, the self-decoupled coil has similar matching robustness but more obvious resonance frequency shift. The decoupling performance of self-decoupled coils is overall better compared to overlapped conventional coils, especially in the light loading (large phantom-coil distance) case.



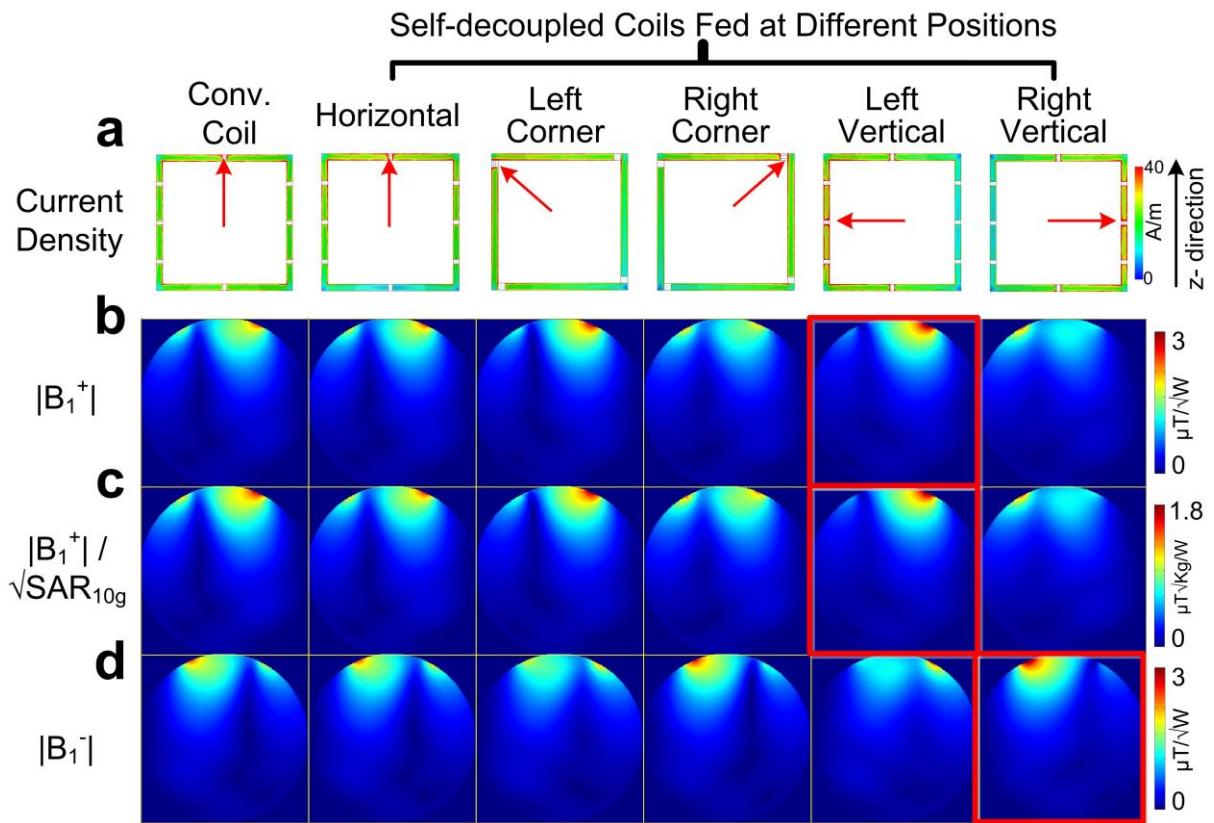

**Supplementary Figure 7** Simulated axial  $B_1$  maps of a conventional coil (uniform current distribution) and self-decoupled coils fed at different positions, as indicated by the red arrows in Supplementary Figure 7a. All coils were  $10 \times 10 \text{ cm}^2$  in size and were placed 1 cm away from a cylindrical phantom (diameter 20 cm, length 30 cm,  $\sigma = 0.6 \text{ S m}^{-1}$  and  $\zeta_r = 78$ ). When fed in its vertical conductor, the self-decoupled coil exhibited "looppole-type"  $B_1$  patterns, which can increase either  $B_1^+$  or  $B_1^-$  at the expense of decreasing the other, which is consistent with previous work. In this simulation, the "looppole-type"  $B_1$  patterns had notable improvements (average 18%) in either transmit efficiency or receive sensitivity (red boxes).

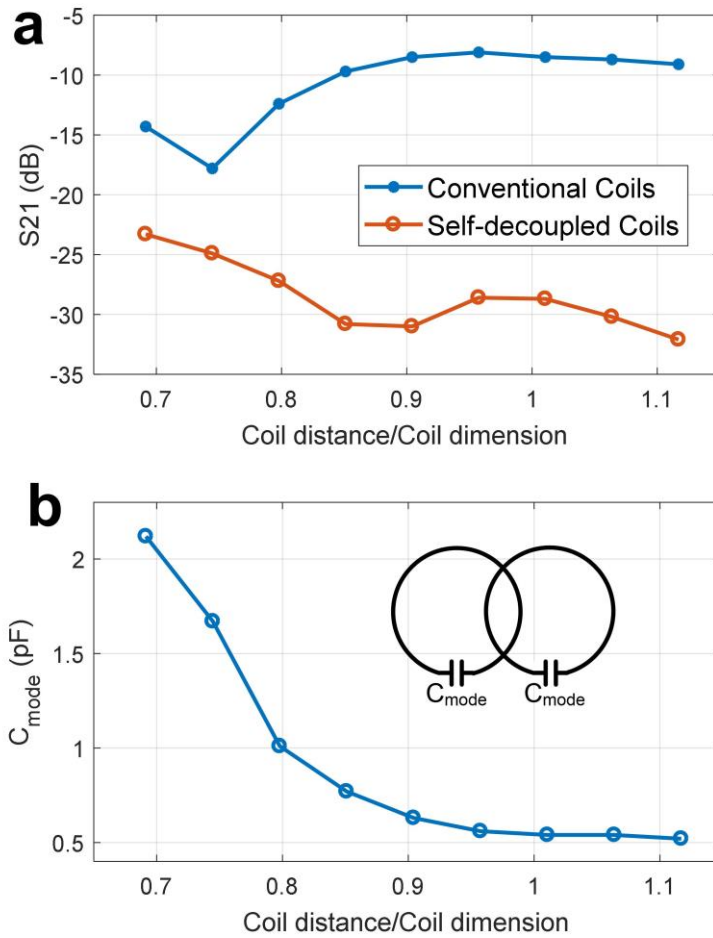

**Supplementary Figure 8** Decoupling capability versus different coil separations. **a)** Simulated  $S_{21}$  of a pair of self-decoupled coils and a pair of conventional coils as a function of the coils' center-to-center distance (i.e., overlapping area). For the conventional coils, a critical overlapping area was required for decoupling. However, the self-decoupled coils maintained excellent decoupling performance over a wide range of overlapping areas. **b)**  $C_{\text{mode}}$  as a function of coil distance. Each circular loop had a dimension of  $10 \times 10 \text{ cm}^2$  and was placed 2 cm away from a tank phantom (dimension  $40 \times 30 \times 20 \text{ cm}^3$ ,  $\sigma = 0.7 \text{ S m}^{-1}$  and  $\zeta_r = 55$ ).

| Coil size<br>(cm <sup>2</sup> ) | C <sub>mode</sub><br>(MHz) | Total X <sub>arm</sub><br>(nH) |
|---------------------------------|----------------------------|--------------------------------|
| <b>10×10</b>                    | 0.44                       | 33.6                           |
| <b>9×9</b>                      | 0.50                       | 49.2                           |
| <b>8×8</b>                      | 0.57                       | 60.4                           |
| <b>7×7</b>                      | 0.65                       | 70.1                           |
| <b>6×6</b>                      | 0.73                       | 77.7                           |
| <b>5×5</b>                      | 0.82                       | 82.2                           |

**Supplementary Table 2** Simulated values of C<sub>mode</sub> and total X<sub>arm</sub> of self-decoupled coils across a range of dimensions (square loop, from 10 × 10 cm<sup>2</sup> to 5 × 5 cm<sup>2</sup>). All coils are tuned to 298 MHz (Larmor frequency at 7 Tesla) and matched to 50 Ohms. The C<sub>mode</sub> values increased approximately linearly as the coil size decreased.

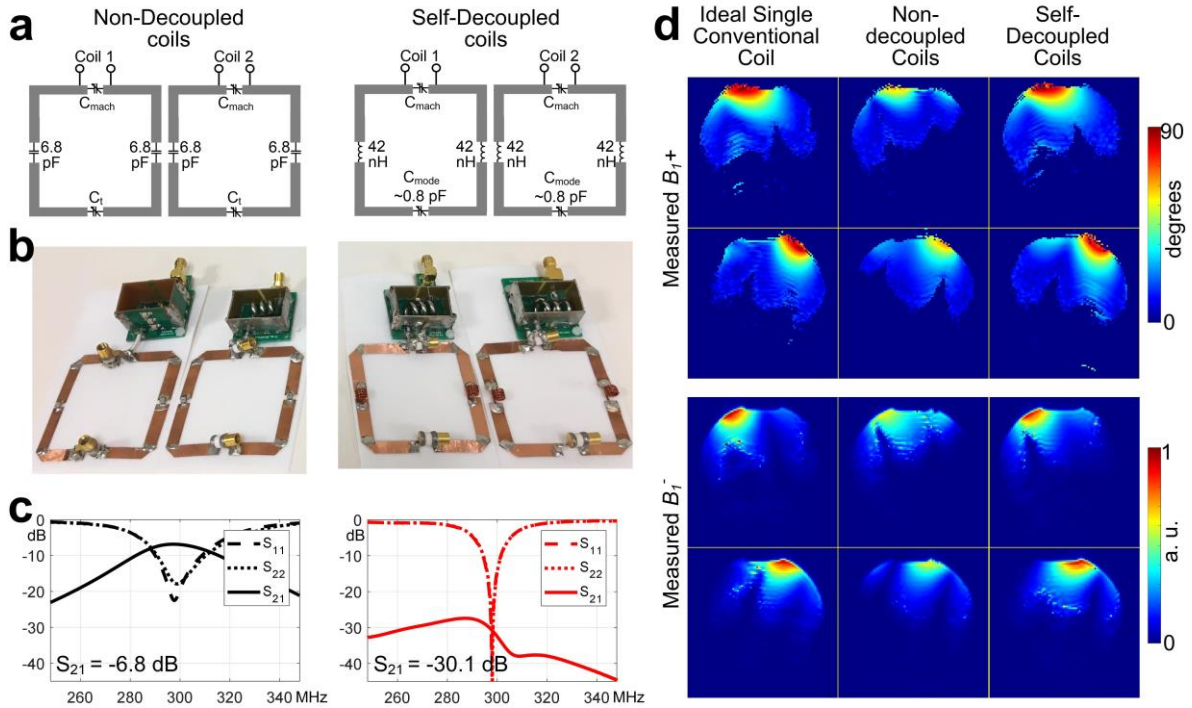

**Supplementary Figure 9** Small ( $5 \times 5$  cm<sup>2</sup>) two-loop coil arrays. **a**) Diagrams of two-element conventional (**left**) and self-decoupled (**right**) coil arrays. **b**) Constructed two-element conventional (**left**) and self-decoupled (**right**) coil arrays. **c**) Measured S-parameter plots of the conventional (**left**) and self-decoupled coils (**right**). **d**) Measured  $B_{1+}$  and normalized  $B_{1-}$  maps of ideal single coils, two conventional loops and two self-decoupled coils in a transverse slice. Compared to the non-decoupled coils, Loop 1 and Loop 2 of the self-decoupled coils had 37% and 21% higher  $B_{1+}$ , and 23% and 31% higher  $B_{1-}$ .

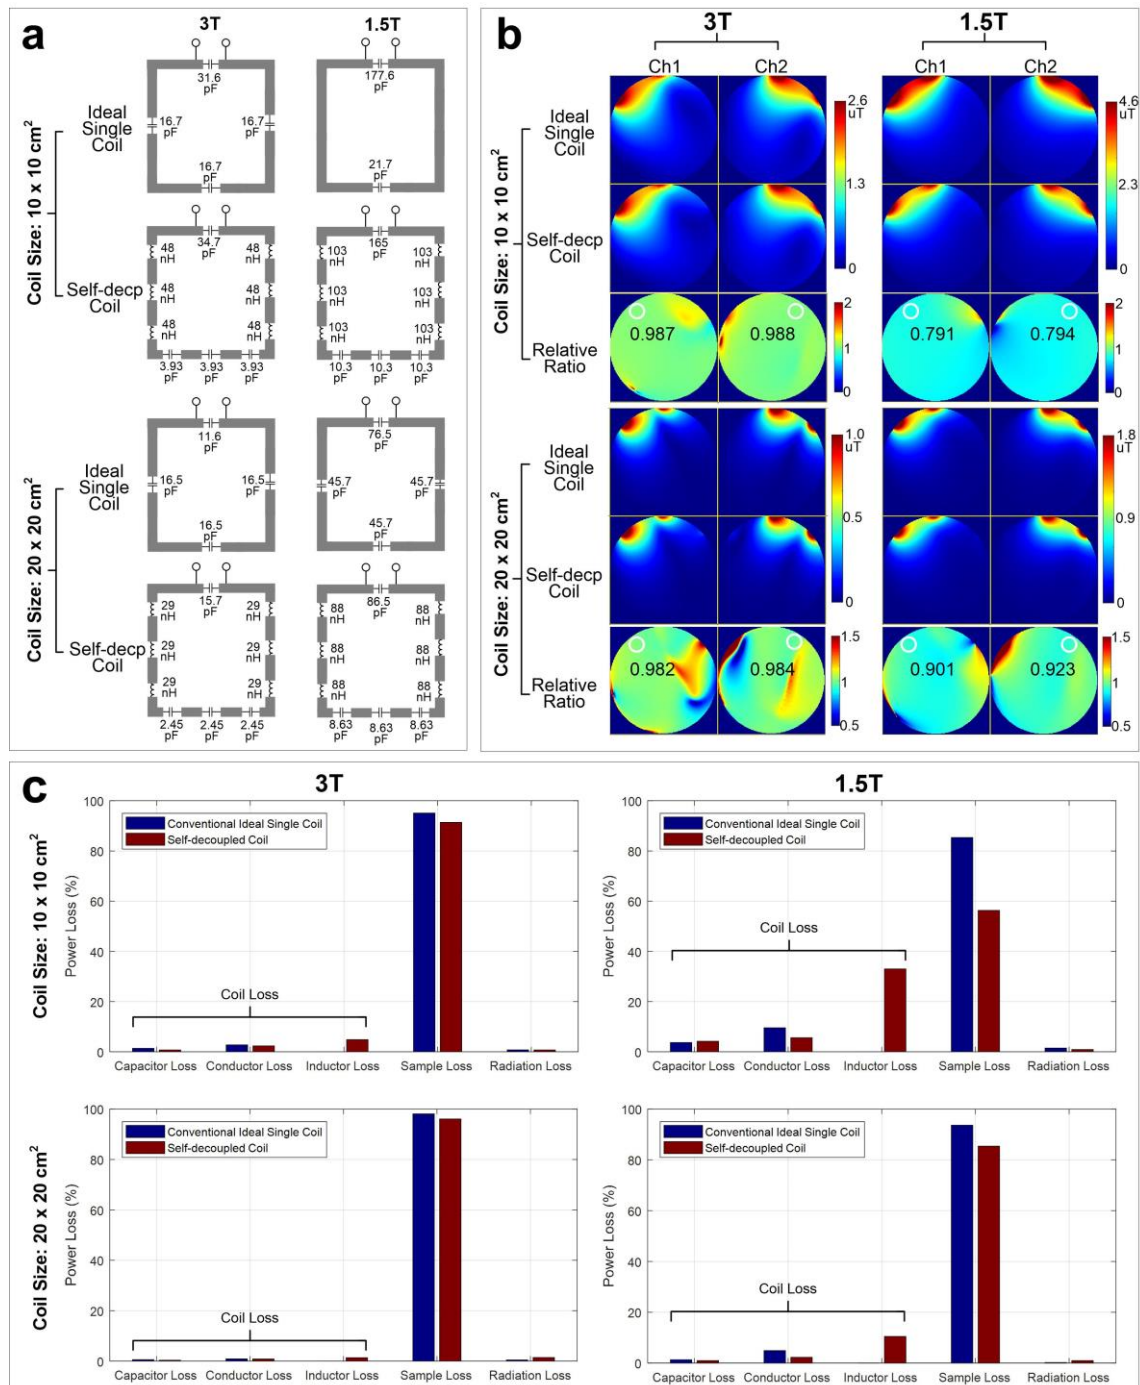

**Supplementary Figure 10** Self-decoupled coils at 1.5 Tesla and 3 Tesla. **a)** Schematic of a single conventional coil with equal capacitance distribution and a single coil from a two-element self-decoupled array at 3 Tesla and 1.5 Tesla. Coils with two different dimensions ( $10 \times 10 \text{ cm}^2$  and  $20 \times 20 \text{ cm}^2$ ) were simulated. All coils were wrapped around a cylindrical phantom ( $\sigma = 0.6 \text{ S m}^{-1}$  and  $\zeta_r = 78$ ) with a separation of 1 cm. The diameters of the cylindrical phantoms were 20 cm and 40 cm for the  $10 \times 10 \text{ cm}^2$  coil and the  $20 \times 20 \text{ cm}^2$  coil,

respectively. Coil conductors were modeled as copper sheets with a conductivity of  $5.8 \times 10^7 \text{ S m}^{-1}$ , and capacitors and inductors were modeled as lossy components considering series resistance. The quality (Q-) factors of the capacitors were between 1000 to 2000 based on datasheets of commercial high-Q non-magnetic capacitors (Passive Plus, 111C Series, Huntington, NY), and the Q-factors of the inductors were set to 250. As in the real case, the coil impedances were well matched to 50 Ohms, with  $S_{11}$ 's less than -30 dB. The isolation between the pair of self-decoupled coils was less than -25 dB. In all simulations, the input power was set to 1 Watt. **b)** Central axial receive sensitivity ( $B_1^-$ ) maps for different coil sizes at 3T and 1.5T. Compared to the ideal single coil without the presence of the other coil, the receive sensitivity of the self-decoupled coil was maintained at 3T, with a decrease  $< 2\%$ . At 1.5 T, however, the receive sensitivity loss is larger, up to 21% for a  $10 \times 10 \text{ cm}^2$  coil. **c)** Analysis of power loss. The power losses were calculated by integrating the surface loss density or volume loss density using a built-in function in the simulation software (ANSYS HFSS, Canonsburg, PA, USA). A significant amount of power was lost in the inductors of the self-decoupled coils ( $X_{arm}$ ) at 1.5 T, partly because the required inductor had a large value, and partly because coil losses are generally larger at low fields. We note that the conductor loss of the self-decoupled coil is slightly smaller than the conventional coil due to its high-impedance structure. The power loss results are consistent with the results in Supplementary Figure 10b, specifically that higher sample loss leads to higher receive sensitivity.
